# Supplementary material for: LRRK2 regulates endoplasmic reticulum–mitochondrial tethering through the PERK‐mediated ubiquitination pathway
Source: PubMed Central journal article supplement (PMC6960452; doi:10.15252/embj.2018100875), 2019-12-10

**Figure 1F**

LC3 (Bafilomycin -)

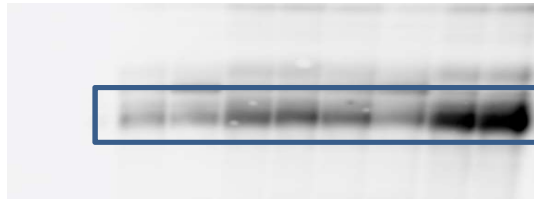

P62 (Bafilomycin -)

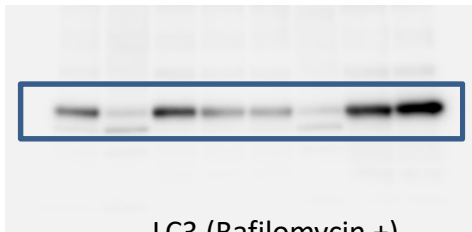

LC3 (Bafilomycin +)

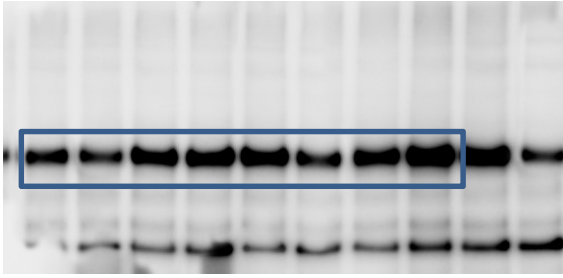

P62 (Bafilomycin +)

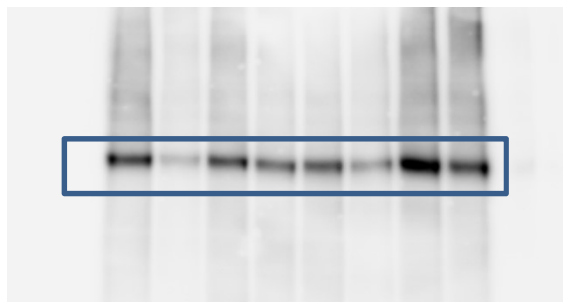

Supplement: EMBJ-39-e100875-s003.pdf [file EMBJ-39-e100875-s003.pdf]
