# Supplementary material for: LRRK2 regulates endoplasmic reticulum–mitochondrial tethering through the PERK‐mediated ubiquitination pathway
Source: PubMed Central journal article supplement (PMC6960452; doi:10.15252/embj.2018100875), 2019-12-10

**Figure 6A**

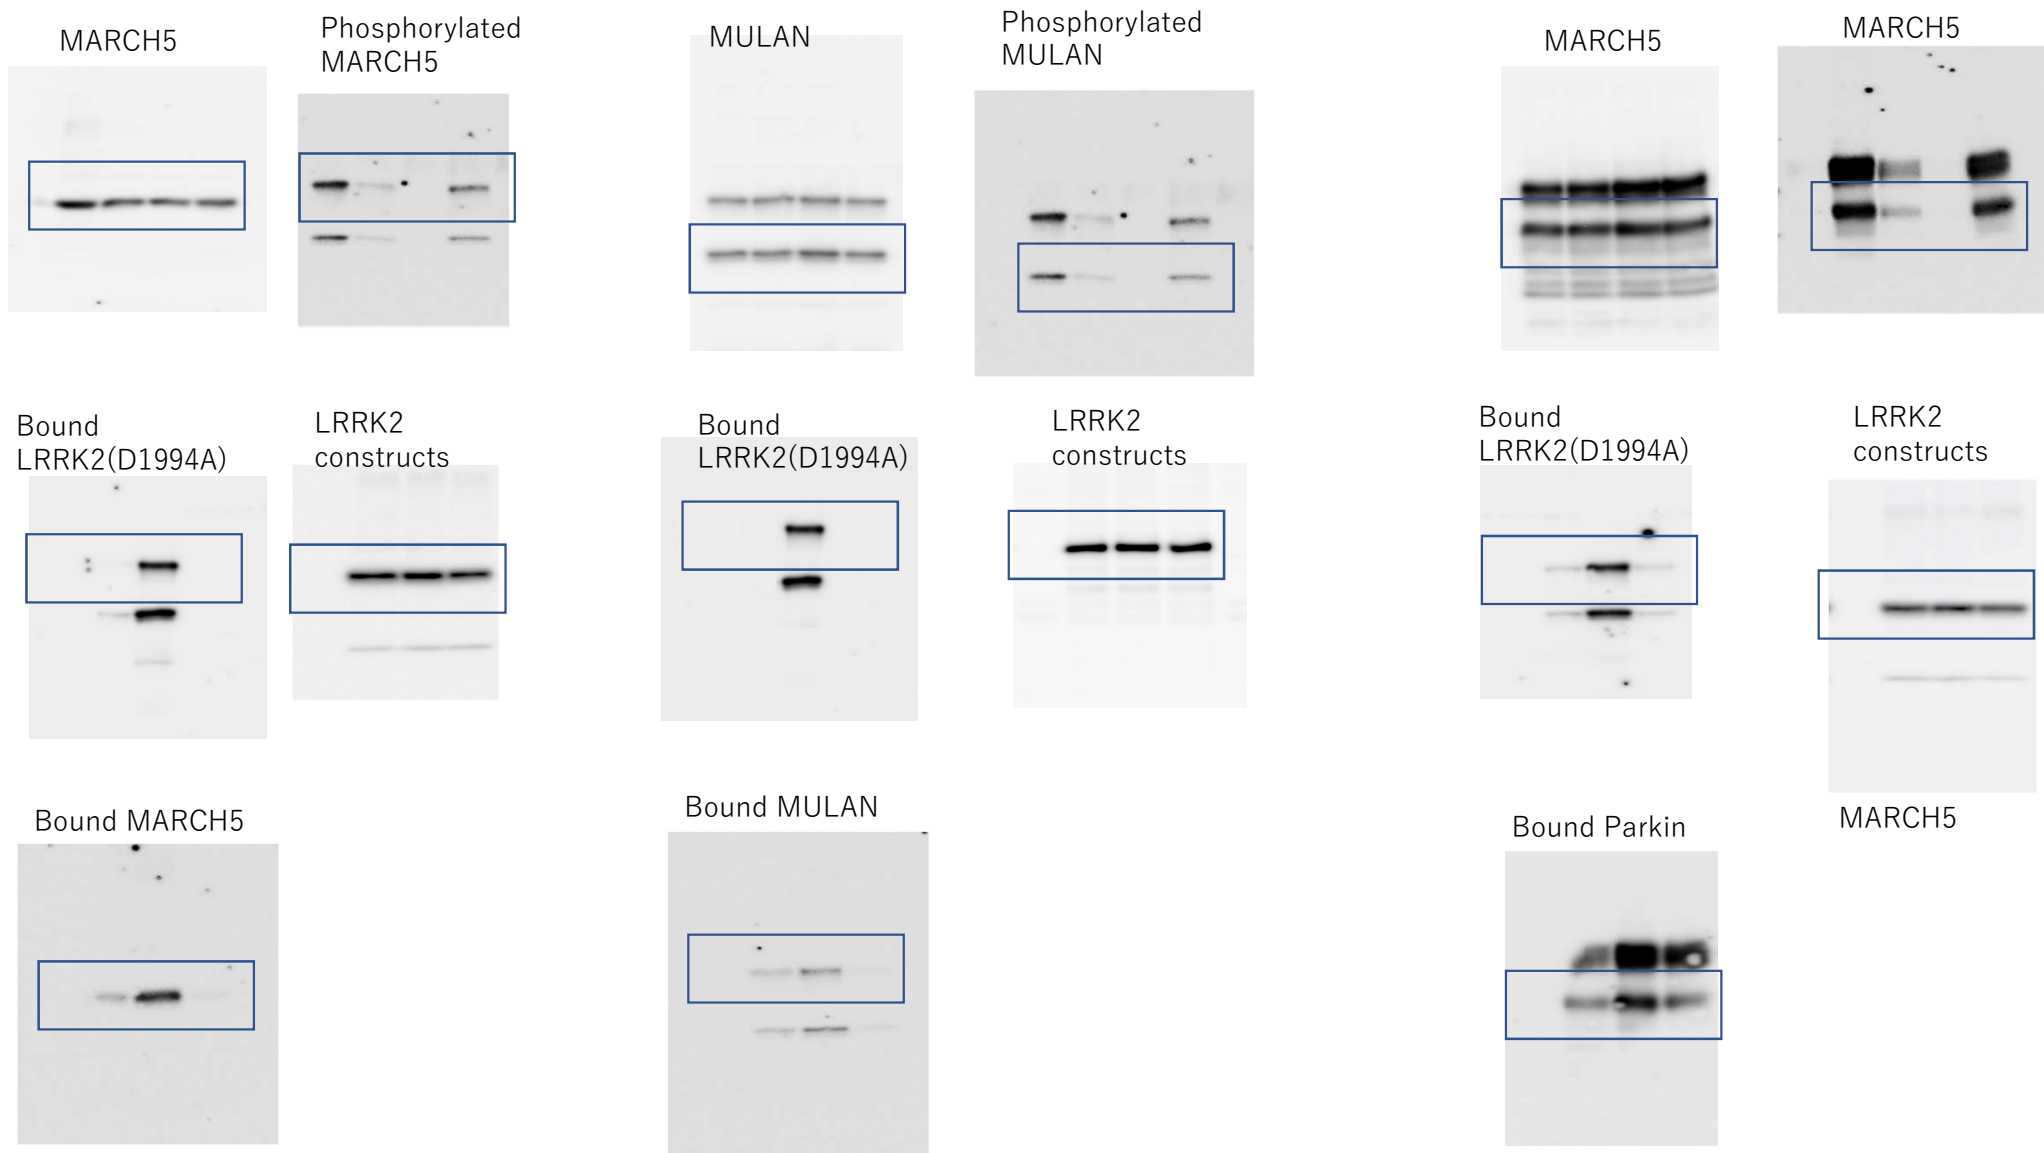

**Figure 6B**

LRRK2 constructs

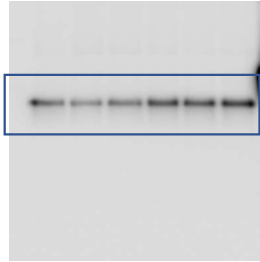

Phosphorylated LRRK2((G2019S))

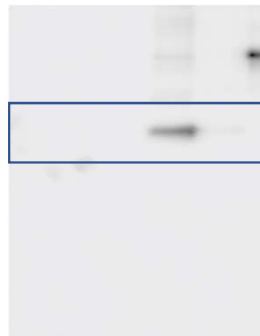

<sup>32</sup>P-labeled LRRK2((G2019S))

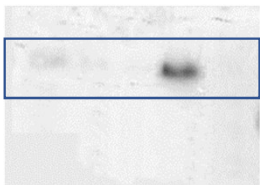

**Figure 6C**

MARCH5 / MULAN / Parkin

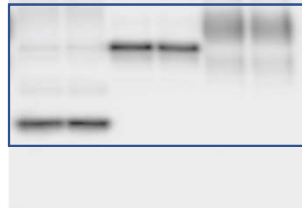

Bound LRRK2(S1290A)

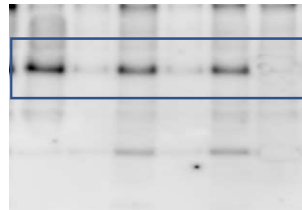

LRRK2 constructs

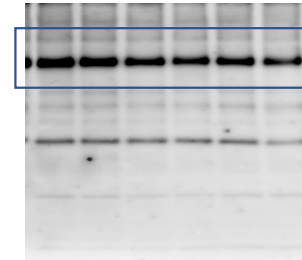

Bound MARCH5 / MULAN / Parkin

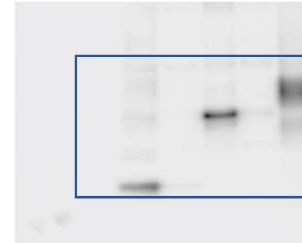

**Figure 6D**

MARCH5 / MULAN / Parkind2

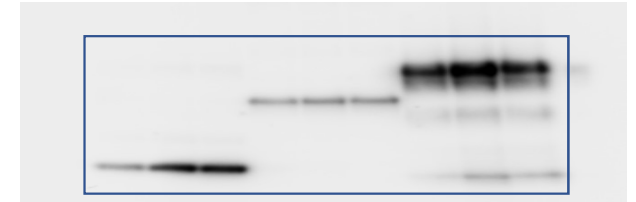

Phosphorylated MARCH5 / MULAN / Parkind2

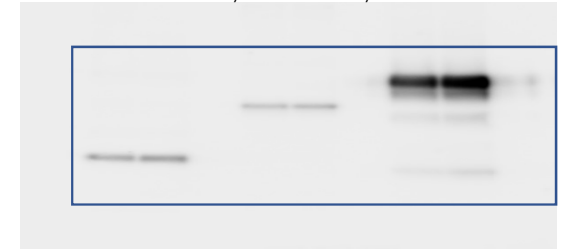

LRRK2 constructs

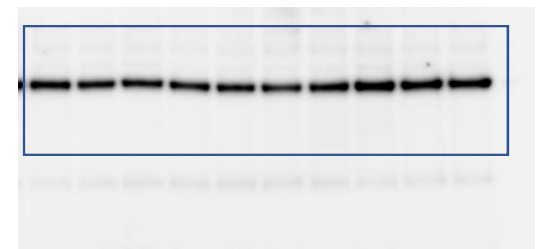

Supplement: EMBJ-39-e100875-s007.pdf [file EMBJ-39-e100875-s007.pdf]
