# Supplementary material for: LRRK2 regulates endoplasmic reticulum–mitochondrial tethering through the PERK‐mediated ubiquitination pathway
Source: PubMed Central journal article supplement (PMC6960452; doi:10.15252/embj.2018100875), 2019-12-10

## Figure 7A

LC3

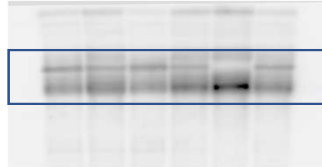

p62

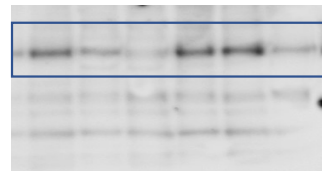

Supplement: EMBJ-39-e100875-s008.pdf [file EMBJ-39-e100875-s008.pdf]
